# Supplementary material for: Layer-by-Layer Deposited Multi-Modal PDAC/rGO Composite-based Sensors
Source: Preprints.org preprint supplement (doi:10.20944/preprints202212.0521.v1), 2022-12-28
Supplement: Supplementary file 1 [file supplementary]

**Supplementary Information**

Layer-by-Layer Deposited Multifunctional PDAC/rGO composite-based sensors

Ammar Al-Hamry 1,*, Tianqi Lu 1, Jing Bai 1, Anurag Adiraju 1, Tharun K. Ega 1, Igor A. Pašti 2 and Olfa Kanoun 1,*

| **Citation:** To be added by editorial staff during production.  Academic Editor: Firstname Lastname  Received: date  Accepted: date  Published: date  **Publisher’s Note:** MDPI stays neutral with regard to jurisdictional claims in published maps and institutional affiliations.  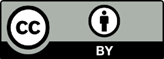  **Copyright:** © 2022 by the authors. Submitted for possible open access publication under the terms and conditions of the Creative Commons Attribution (CC BY) license (https://creativecommons.org/licenses/by/4.0/). |
| --- |

1 Measurement and Sensor Technology, Department of Electrical Engineering and Information Technology, Chemnitz University of Technology, 09107 Chemnitz, Germany; Tianqi.Lu@etit.tu-chemnitz.de (T.L.); Baijingwhy@gmail.com (J.B.); Adiraju.Anurag@etit.tu-chemnitz.de (A.A.); e-mail@e-mail.com (T.K.E.)

2 Faculty of Physical Chemistry, University of Belgrade, Studentski trg 12-16, 11158 Belgrade, Serbia; Igor@ffh.bg.ac.rs (I.A.P)

***** Correspondence: Ammar.Al-Hamry@etit.tu-chemnitz.de (A.A.-H.); Olfa.Kanoun@etit.tu-chemnitz.de (O.K.)

**Supplementary figures:**


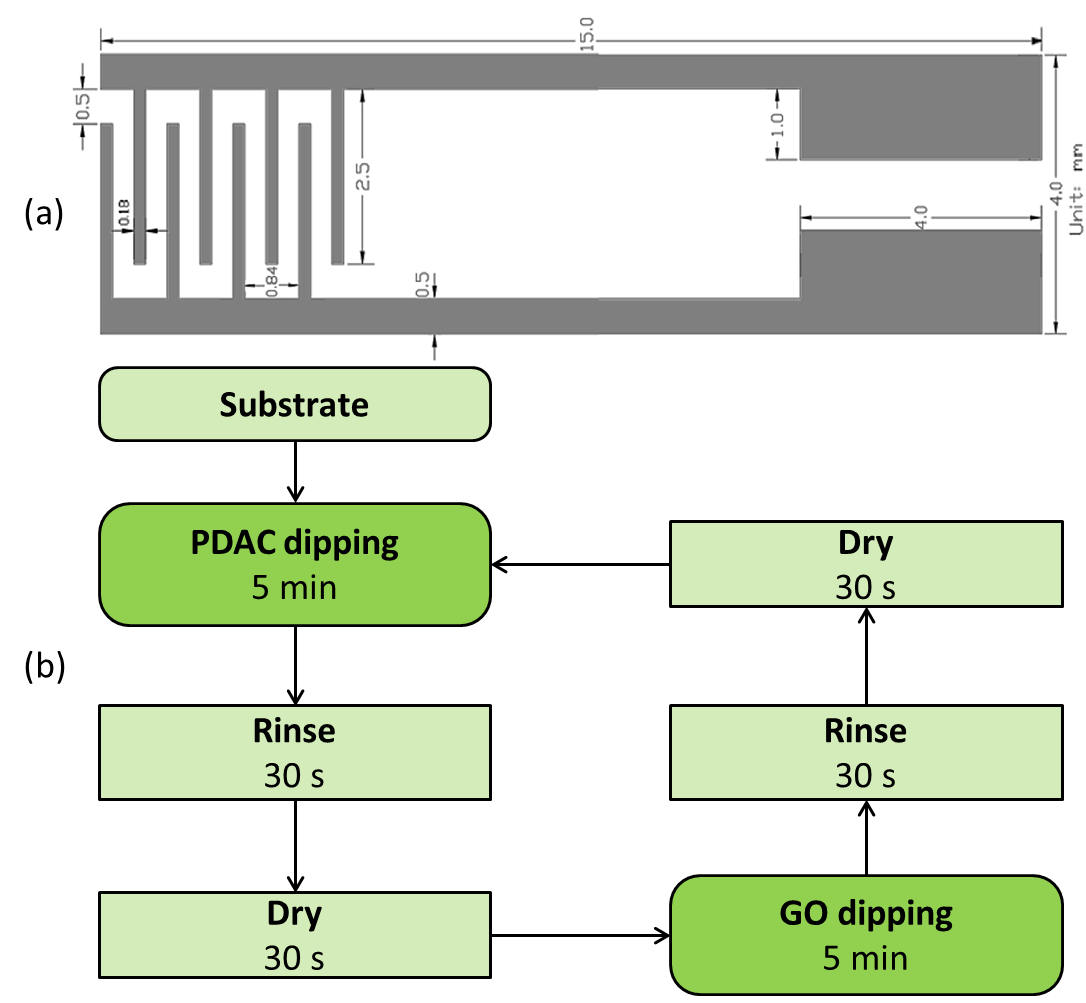


**Figure S1.** (a) Schematic representation of the screen printed Ag electrode used for the LbL deposition of PDAC/GO bi-layers; (b) Protocol for the LbL deposition of the PDAC/GO bi-layers.


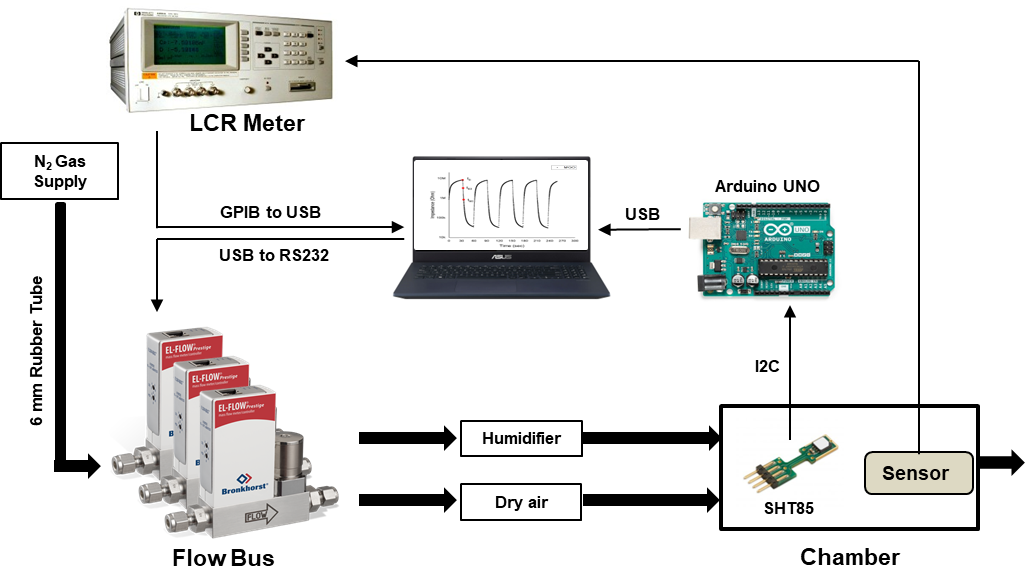


**Figure S2.** The block and connection diagram of the humidity measurement system.


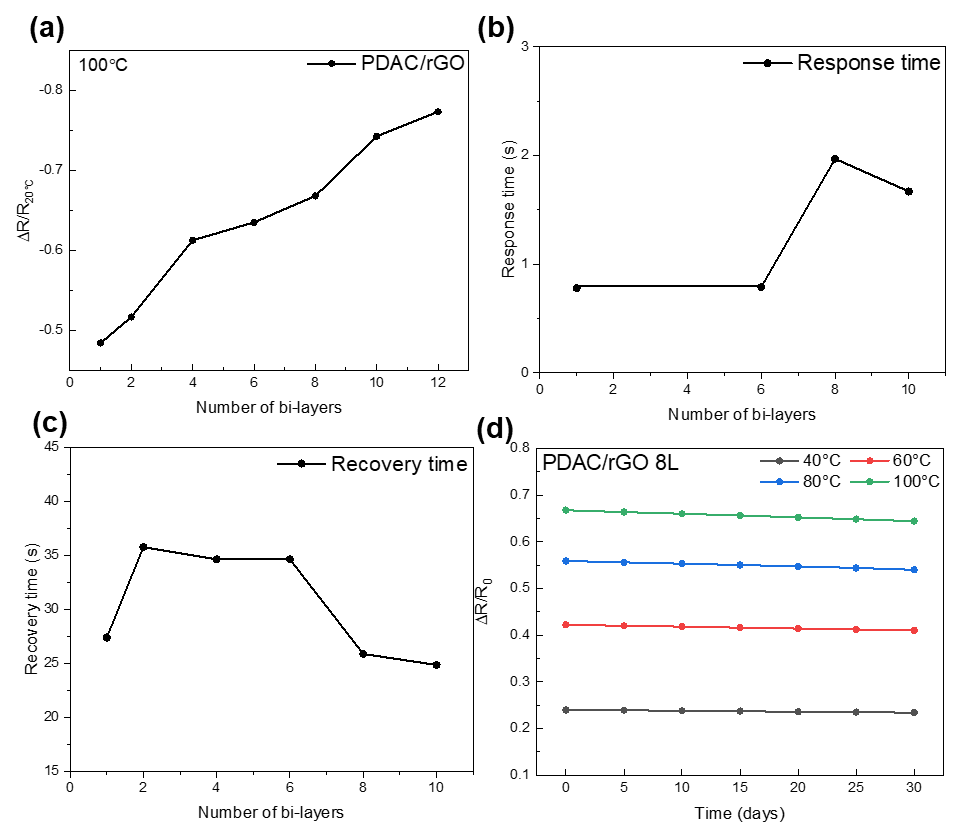


**Figure S3.** Temperature measurement (a) sensitivity curve as the function of the number of the PDAC/rGO layers; (b) response time as the function of the number of the PDAC/rGO layers; (c) recovery time as the function of the number of the PDAC/rGO layers; (d) Long-term stability curves for the temperature measurements using PDAC/rGO-8L sensor.


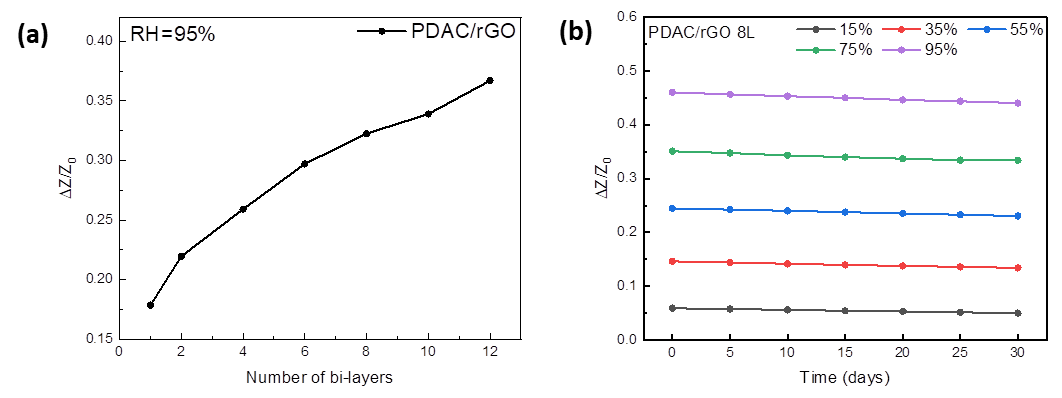


**Figure S4.** (a) Sensitivity of the response as response curve of different layers for the relative humidity measurements; (b) Long-term stability curves for the relative humidity measurements using PDAC/rGO-8L sensor.

**Table S1.** Information of the detected real samples.

| **Sample** | **Type** | **Storage temp.** | **Storage time** |
| --- | --- | --- | --- |
| Wine | Rot Tempranillo 2015 Trocken, original liquid (Alcohol: 10.5%) | Room temperature | Newly opened |
| Coffee | Saturated brewed solution  (0.2020 g/ml) | Room temperature | Newly opened |
| Fresh Beef | Ground meat (10 g) | 8 °C | 2 days |
| Spoiled Beef | Ground meat (10 g) | 8 °C | 10 days |
| Fresh Pork | Ground meat (10 g) | 8 °C | 2 days |
| Spoiled Pork | Ground meat (10 g) | 8 °C | 10 days |
